# Supplementary material
Source: MDPI journal article supplement (https://www.mdpi.com/2076-0760/10/5/182)
Supplement: s1 [file s1]

Archive with 5 entries (3 files):
- socsci-1189197-supplementary/
- socsci-1189197-supplementary/Supp_Mats/
- socsci-1189197-supplementary/Supp_Mats/.DS_Store
- socsci-1189197-supplementary/Supp_Mats/Supplemental_Material_revised.pdf
- socsci-1189197-supplementary/Supp_Mats/SurveyQuestions_for_PeerReview.pdf
